# Supplementary material for: Mineralocorticoid receptors dampen glucocorticoid receptor sensitivity to stress via regulation of FKBP5
Source: PubMed Central journal article supplement — Cell Rep. Author manuscript; Available in PMC 2021 Jun 30. (PMC8244946; doi:10.1016/j.celrep.2021.109185), 2021-06-01
Supplement: NIHMS1710586-supplement-1.pdf [file NIHMS1710586-supplement-1.pdf]

**Supplemental information**

**Mineralocorticoid receptors dampen  
glucocorticoid receptor sensitivity  
to stress via regulation of FKBP5**

**Jakob Hartmann, Thomas Bajaj, Claudia Klengel, Chris Chatzinakos, Tim Ebert, Nina Dedic, Kenneth M. McCullough, Roy Lardenoije, Marian Joëls, Onno C. Meijer, Katharine E. McCann, Serena M. Dudek, R. Angela Sarabdjitsingh, Nikolaos P. Daskalakis, Torsten Klengel, Nils C. Gassen, Mathias V. Schmidt, and Kerry J. Ressler**

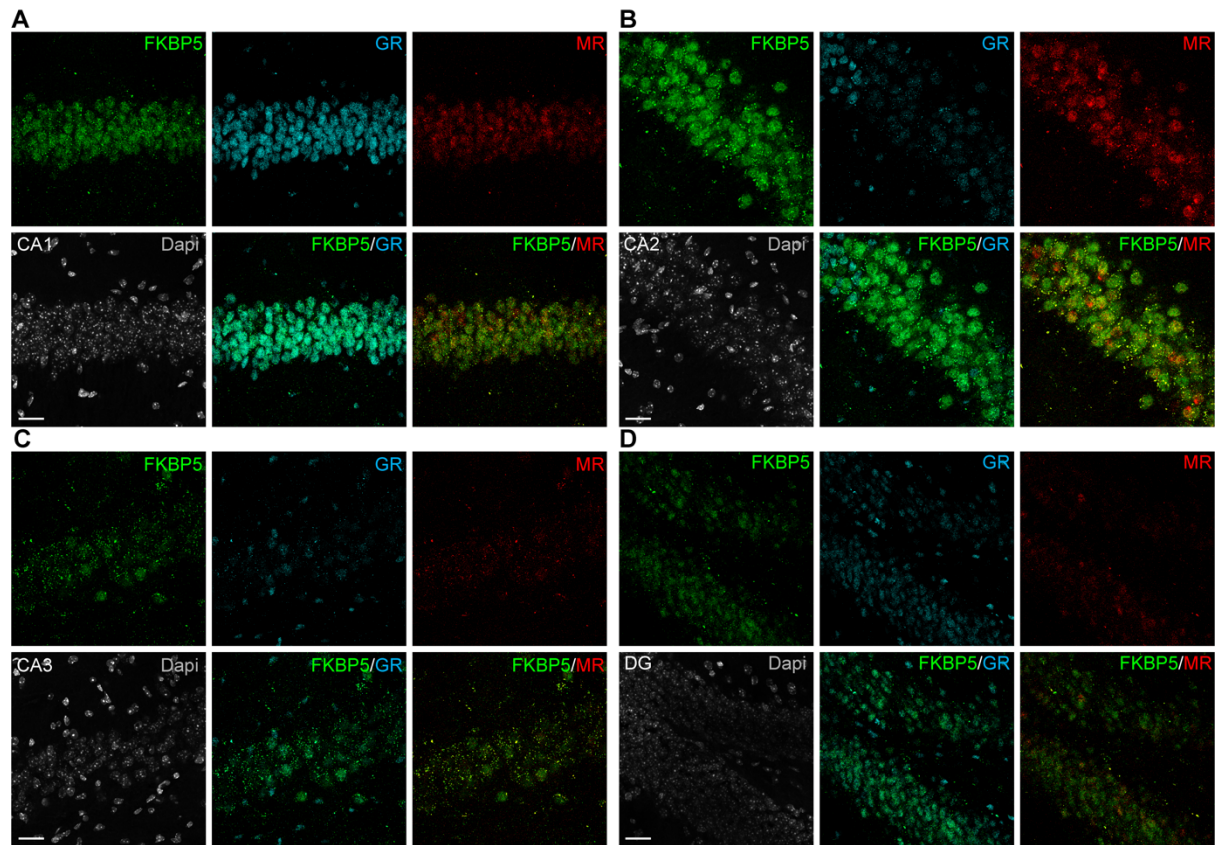

**Figure S1. FKBP5, GR and MR protein expression patterns in the mouse hippocampus, related to Figure 2. (A) CA1, (B) CA2, (C) CA3 and (D) dentate gyrus (DG).** Coronal sections of C57BL/6J mice ( $n = 5$  mice) were stained for FKBP5, GR and MR protein as well as DAPI (4,6-diamidino-2-phenylindole). FKBP5 and MR exhibit similar expression patterns in the hippocampus, which is distinct from that of the GR. FKBP5 and MR expression is most prominent in hippocampal subregion CA2, whereas GR expression is strongly expressed in the CA1. Scale bar, 25  $\mu\text{m}$ .

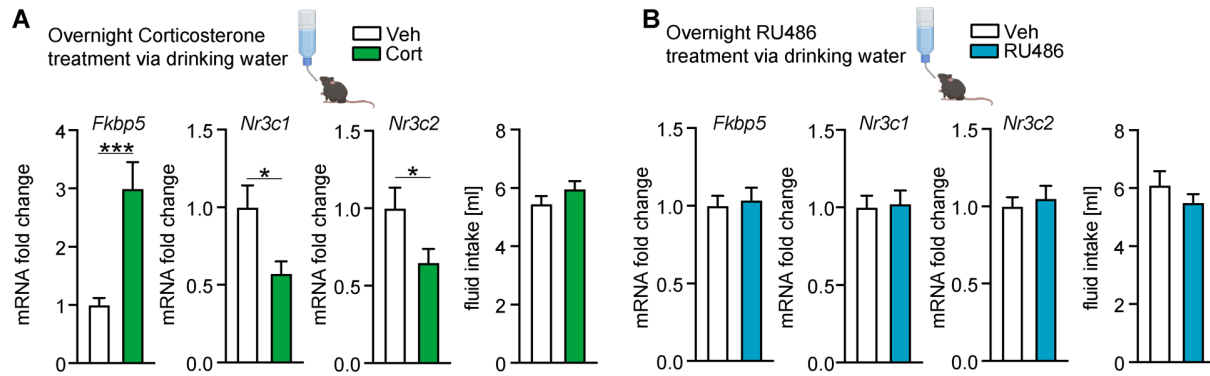

**Figure S2.** *Fkbp5*, *Nr3c1* and *Nr3c2* mRNA expression in the hippocampus of C57BL/6J mice following overnight corticosterone or RU486 treatment via drinking water, related to Figure 5A-C. **(A)** *Fkbp5* mRNA expression is increased in the hippocampus of C57BL/6J mice following overnight treatment with corticosterone (*Fkbp5*,  $t_{17} = 4.039$ ,  $p < 0.001$ ), while *Nr3c1* and *Nr3c2* mRNA levels are decreased (*Nr3c1*,  $t_{18} = 2.650$ ,  $p < 0.05$ ; *Nr3c2*,  $t_{18} = 2.213$ ,  $p < 0.05$ ). Overnight fluid intake did not differ between vehicle and corticosterone treated mice. **(B)** Overnight treatment with the GR antagonist RU486 did not alter the expression of *Fkbp5*, *Nr3c1* and *Nr3c2* mRNA. Overnight fluid intake did not differ between vehicle and RU486 treated mice. Unpaired, two-tailed Student's t-test; \* =  $p < 0.05$ ; \*\*\* =  $p < 0.001$ . Data are presented as mean + SEM.  $n = 9-10$  mice per group.

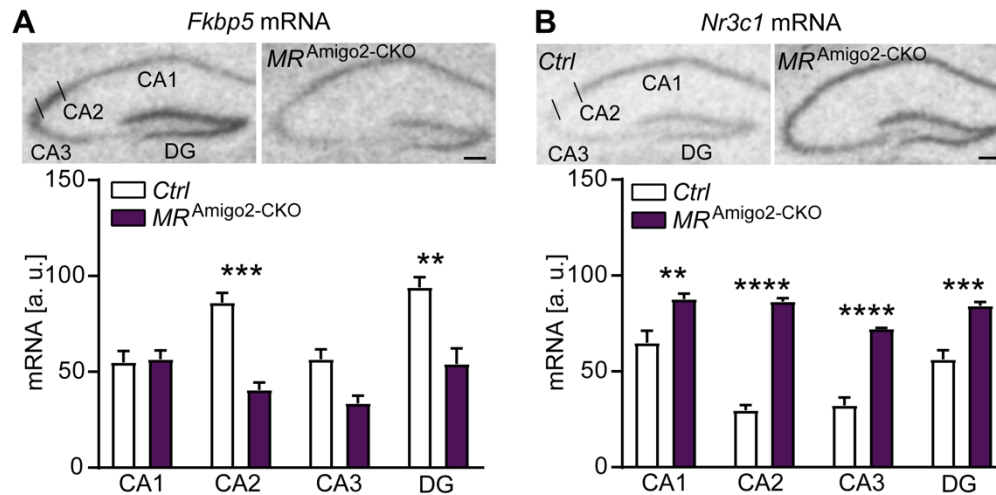

**Figure S3. *Fkbp5* and *Nr3c1* mRNA expression in the hippocampus of MR<sup>Amigo2</sup>-CKO mice, related to Figure 5D and E. (A)** MR<sup>Amigo2</sup>-CKO mice show lower *Fkbp5* mRNA levels (genotype x hippocampal sub-region interaction  $F_{3,16} = 7.66$ ,  $p < 0.01$ ), while *Nr3c1* mRNA expression **(B)** is increased in the hippocampus determined by ISH (genotype x sub-region interaction  $F_{3,16} = 8.76$ ,  $p < 0.001$ ). Top panels - representative autoradiographs of hippocampal *Fkbp5* or *Nr3c1* mRNA expression. Lower panel - quantified expression of *Fkbp5* or *Nr3c1* mRNA. Two-way ANOVA + Bonferroni post hoc test; \*\* =  $p < 0.01$ ; \*\*\* =  $p < 0.001$ ; \*\*\*\* =  $p < 0.0001$ . Data are presented as mean + SEM.  $n = 3$  mice per group. Scale bar, 250  $\mu\text{m}$ .

**Table S1. Key information about each donor, related to Figure 1D-E and STAR Methods.**

| Donor      | Sex    | Age (y) | Race/Ethnicity   | Postmortem Interval (h) |
|------------|--------|---------|------------------|-------------------------|
| H0351.1009 | Male   | 57      | Caucasian        | 25.5                    |
| H0351.1012 | Male   | 31      | Caucasian        | 17.5                    |
| H0351.1015 | Female | 49      | Hispanic         | 30                      |
| H0351.1016 | Male   | 55      | Caucasian        | 18                      |
| H0351.2001 | Male   | 24      | African American | 23                      |
| H0351.2002 | Male   | 39      | African American | 10                      |
